# Supplementary material
Source: Springer Nature journal article supplement (https://www.springermedizin.de/resource/supplementary/12958_2012_1088_MOESM3_ESM.pdf/9566768)
Supplement: MOESM3 [file 9566768]

Con 72h

100nM CRH 72h

100 $\mu$ M cAMP 72h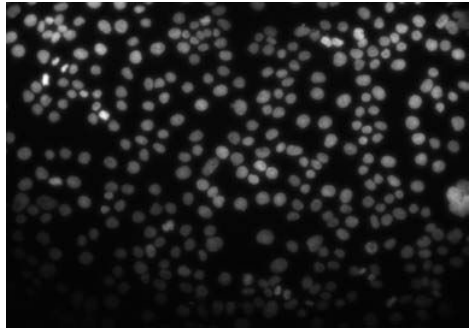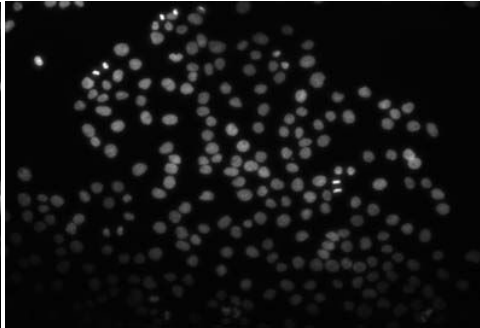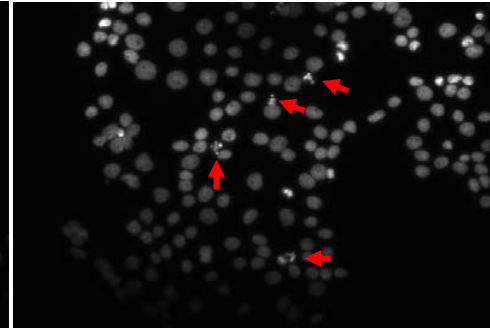

A

Con 72h

100nM CRH 72h

100 $\mu$ M cAMP 72h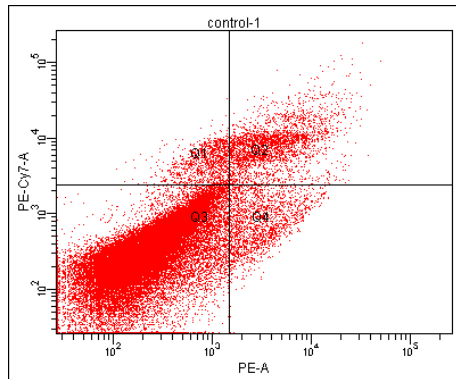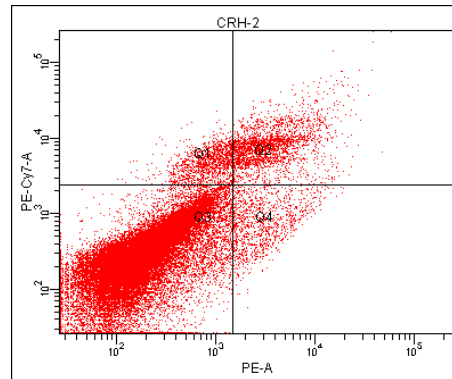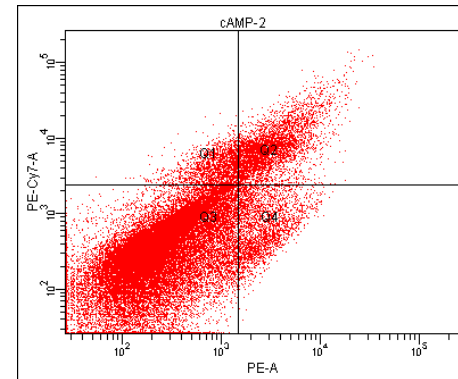

B

| 72h              | Viable             | Apoptosis+Necrosis |
|------------------|--------------------|--------------------|
| Con              | 88.0 $\pm$ 1.48    | 11.81 $\pm$ 1.36   |
| 100nM CRH        | 88.3 $\pm$ 2.68    | 11.43 $\pm$ 2.74   |
| 100 $\mu$ M cAMP | 83.26 $\pm$ 1.30 * | 16.40 $\pm$ 1.14 * |

C
